# Supplementary material for: Divergent Genomic and Epigenomic Landscapes of Lung Cancer Subtypes Underscore the Selection of Different Oncogenic Pathways during Tumor Development
Source: PLoS One. 2012 May 21;7(5):e37775. doi: 10.1371/journal.pone.0037775 (PMC3357406; doi:10.1371/journal.pone.0037775)
Supplement: Table S3 — SqCC-Specific Copy Number Alteration Present in CIS Cases. (XLSX) [file pone.0037775.s004.xlsx]

## Sheet: Sheet1
Status of SqCC-Specific Copy Number Alteration in CIS Cases*
*To determine whether any of the SqCC specific regions are apparent in pre-malignant lesions, 20 Carcinoma In Situ samples profiled by BAC array were assessed. Samples were processed as previously described (Lockwood 2010; and this manuscript) and the same criteria for validation was used. Regions altered in >20% of cases in the the predicted direction are shown
Regions Present in CIS
SqCCregions	Main Alteration	Chromosome	BPStart_BAC	BPEnd_BAC	Chr	Freq Gain	Freq Loss
SCC1	SqCC Loss	1	12724432	15698667	1	0.2	0.45
SCC2	SqCC Loss	1	16646685	17912534	1	0.2	0.45
SCC3	SqCC Loss	1	145425752	146322352	1	0.2	0.4
SCC5	SqCC Gain	2	9078624	9226809	2	0.3	0
SCC6	SqCC Gain	2	23828557	26759879	2	0.4	0
SCC7	SqCC Gain	2	28352479	28623924	2	0.35	0
SCC8	SqCC Gain	2	30764067	58789506	2	0.45	0.05
SCC9	SqCC Gain	2	59733640	59886525	2	0.25	0.05
SCC10	SqCC Gain	2	60013354	73308658	2	0.3	0.05
SCC11	SqCC Gain	2	85253802	85441988	2	0.25	0.05
SCC12	SqCC Loss	2	204414593	206551013	2	0.05	0.25
SCC13	SqCC Loss	2	207884992	208085679	2	0.05	0.25
SCC14	SqCC Loss	2	215179714	231220067	2	0.05	0.4
SCC15	SqCC Loss	2	233347404	234682197	2	0.1	0.3
SCC16	SqCC Loss	2	234995819	236313795	2	0.1	0.3
SCC17	SqCC Loss	3	46140	191004	3	0.1	0.75
SCC18	SqCC Loss	3	52764662	52910461	3	0	0.65
SCC20	SqCC Loss	3	59398766	66529912	3	0.05	0.7
SCC21	SqCC Loss	3	67949317	68609084	3	0	0.7
SCC22	SqCC Loss	3	70539394	72195108	3	0	0.7
SCC24	SqCC Loss	3	72221466	78337541	3	0	0.7
SCC25	SqCC Gain	3	95175507	114210819	3	0.75	0.05
SCC26	SqCC Gain	3	106392478	106506035	3	0.7	0.05
SCC27	SqCC Gain	3	114142781	114624606	3	0.85	0
SCC28	SqCC Gain	3	114555659	114870950	3	0.75	0.1
SCC29	SqCC Gain	3	114814923	115117759	3	0.75	0.1
SCC30	SqCC Gain	3	115123505	120279611	3	0.85	0
SCC31	SqCC Gain	3	120210462	120384401	3	0.85	0
SCC32	SqCC Gain	3	120333489	124055719	3	0.85	0
SCC33	SqCC Gain	3	123998609	126734092	3	0.85	0
SCC34	SqCC Gain	3	126649931	129741914	3	0.8	0
SCC35	SqCC Gain	3	129817388	130999376	3	0.8	0
SCC36	SqCC Gain	3	130888268	131723522	3	0.65	0.1
SCC37	SqCC Gain	3	131723553	136724165	3	0.9	0
SCC38	SqCC Gain	3	136752315	136937075	3	0.95	0
SCC39	SqCC Gain	3	136891829	137086328	3	0.95	0
SCC40	SqCC Gain	3	137052018	140420739	3	0.95	0
SCC41	SqCC Gain	3	140305258	140520481	3	0.95	0
SCC42	SqCC Gain	3	140414156	141053191	3	0.95	0
SCC43	SqCC Gain	3	140969298	141665984	3	0.95	0
SCC44	SqCC Gain	3	141579255	141629266	3	0.95	0
SCC45	SqCC Gain	3	141687413	142042468	3	0.95	0
SCC46	SqCC Gain	3	141977379	142716241	3	0.95	0
SCC47	SqCC Gain	3	142657253	142860458	3	0.95	0
SCC48	SqCC Gain	3	142722682	187398343	3	1	0
SCC49	SqCC Gain	3	187394849	188517181	3	0.95	0.05
SCC50	SqCC Gain	3	188390804	188562337	3	0.95	0
SCC51	SqCC Gain	3	188542784	189237252	3	0.95	0.05
SCC52	SqCC Gain	3	189166840	189469832	3	0.95	0
SCC53	SqCC Gain	3	189438384	189622226	3	0.95	0
SCC54	SqCC Gain	3	189534016	189971532	3	0.95	0
SCC55	SqCC Gain	3	189898830	190076997	3	0.95	0
SCC56	SqCC Gain	3	190057935	190371356	3	0.95	0
SCC57	SqCC Gain	3	190306876	190600506	3	0.95	0
SCC58	SqCC Gain	3	190572724	194928758	3	0.95	0
SCC59	SqCC Gain	3	194809780	195170190	3	0.85	0.05
SCC60	SqCC Gain	3	195127730	195287931	3	0.95	0
SCC61	SqCC Gain	3	195247369	197697619	3	0.95	0
SCC62	SqCC Gain	3	197593657	198765727	3	0.95	0
SCC63	SqCC Gain	3	198819675	199131632	3	0.95	0
SCC64	SqCC Gain	3	199093081	199240277	3	0.95	0
SCC65	SqCC Gain	3	199094088	199276959	3	0.95	0
SCC66	SqCC Loss	4	26152	563847	4	0.05	0.7
SCC67	SqCC Loss	4	4029804	6750856	4	0	0.55
SCC68	SqCC Loss	4	8504444	37769154	4	0	0.9
SCC69	SqCC Loss	4	40491304	47719393	4	0	0.6
SCC70	SqCC Loss	4	76998728	77092511	4	0.25	0.25
SCC71	SqCC Loss	4	85378144	85692474	4	0.2	0.25
SCC72	SqCC Loss	4	87196674	87397572	4	0.2	0.2
SCC73	SqCC Loss	4	91900371	94386063	4	0.2	0.2
SCC74	SqCC Loss	4	96656839	161488747	4	0.2	0.4
SCC75	SqCC Loss	4	162779390	191013899	4	0.05	0.55
SCC76	SqCC Loss	5	49565755	49913062	5	0.05	0.4
SCC77	SqCC Loss	5	49913068	64474222	5	0	0.6
SCC78	SqCC Loss	5	65479269	68338269	5	0	0.55
SCC79	SqCC Loss	5	70983047	74278191	5	0	0.6
SCC80	SqCC Loss	5	82785097	82893498	5	0	0.5
SCC81	SqCC Loss	5	82998090	84111334	5	0	0.5
SCC82	SqCC Loss	5	87537837	89342361	5	0	0.5
SCC83	SqCC Loss	5	106295281	107503463	5	0.1	0.3
SCC84	SqCC Loss	5	115609699	116136004	5	0	0.45
SCC85	SqCC Loss	5	122126199	122780319	5	0	0.5
SCC86	SqCC Gain	5	126285990	126480680	5	0.7	0.1
SCC87	SqCC Loss	5	128081739	128475263	5	0	0.45
SCC88	SqCC Loss	5	134388184	137208902	5	0	0.6
SCC89	SqCC Loss	5	140488471	150187832	5	0	0.55
SCC90	SqCC Loss	5	150265542	162134231	5	0	0.6
SCC91	SqCC Loss	5	164139067	180715161	5	0	0.65
SCC92	SqCC Gain	7	72665923	73781634	7	0.6	0
SCC93	SqCC Gain	7	76434709	77313414	7	0.45	0
SCC94	SqCC Gain	7	91165376	91319876	7	0.45	0
SCC95	SqCC Gain	7	96778935	96939405	7	0.4	0
SCC96	SqCC Loss	8	7035076	7212423	8	0	0.9
SCC97	SqCC Gain	8	35919704	36497738	8	0.6	0.1
SCC98	SqCC Gain	8	36402463	36699101	8	0.65	0.05
SCC99	SqCC Gain	8	36652993	38507244	8	0.8	0
SCC100	SqCC Gain	8	38425876	38555735	8	0.85	0
SCC101	SqCC Gain	8	38488999	39094631	8	0.8	0
SCC102	SqCC Gain	8	39051924	39797061	8	0.75	0
SCC103	SqCC Gain	8	39836598	39985605	8	0.75	0
SCC104	SqCC Gain	8	39973682	40163169	8	0.75	0
SCC105	SqCC Gain	8	40056045	40344796	8	0.75	0
SCC106	SqCC Gain	8	40313395	43912178	8	0.6	0
SCC107	SqCC Gain	8	47010496	47159940	8	0.25	0.25
SCC108	SqCC Gain	8	48379790	48536031	8	0.45	0.1
SCC110	SqCC Gain	9	35985129	37353818	9	0.25	0.55
SCC112	SqCC Gain	9	67308817	70343347	9	0.2	0.6
SCC113	SqCC Gain	9	95562861	98300736	9	0.3	0.15
SCC114	SqCC Gain	9	99980869	100149313	9	0.3	0.2
SCC115	SqCC Gain	9	101422188	101787114	9	0.25	0.25
SCC116	SqCC Gain	9	113230428	113848887	9	0.55	0.15
SCC117	SqCC Gain	9	113878433	114045736	9	0.3	0.2
SCC118	SqCC Gain	9	113999189	114554189	9	0.5	0.1
SCC119	SqCC Loss	10	45544340	47166564	10	0	0.35
SCC120	SqCC Loss	10	49636477	50237413	10	0	0.35
SCC121	SqCC Loss	10	88945287	89105572	10	0	0.2
SCC122	SqCC Loss	11	6811797	7129595	11	0	0.35
SCC123	SqCC Loss	11	10200314	14192220	11	0	0.45
SCC126	SqCC Gain	12	36819	345401	12	0.25	0.2
SCC127	SqCC Gain	12	323551	8160827	12	0.25	0
SCC133	SqCC Gain	12	54124295	54295219	12	0.35	0.1
SCC136	SqCC Gain	13	107062653	107270909	13	0.25	0.3
SCC138	SqCC Gain	15	27748493	27912107	15	0.3	0.2
SCC139	SqCC Gain	15	42683685	42843151	15	0.2	0.2
SCC140	SqCC Gain	15	54721062	55003360	15	0.25	0.2
SCC141	SqCC Gain	15	61956493	62119126	15	0.3	0.2
SCC142	SqCC Gain	15	74704786	74855274	15	0.25	0.2
SCC143	SqCC Gain	15	79676203	80412510	15	0.25	0.2
SCC144	SqCC Gain	15	80749536	80912364	15	0.25	0.2
SCC145	SqCC Gain	15	80920701	82889233	15	0.25	0.2
SCC146	SqCC Gain	15	88461614	89260209	15	0.25	0.2
SCC147	SqCC Gain	15	99701465	99956989	15	0.4	0.1
SCC148	SqCC Loss	16	4961896	7586817	16	0	0.25
SCC149	SqCC Loss	16	7596894	7869022	16	0	0.25
SCC150	SqCC Loss	16	29546566	29726856	16	0.05	0.25
SCC151	SqCC Loss	16	48471525	48638074	16	0.05	0.45
SCC154	SqCC Gain	18	7216585	7391076	18	0.35	0.1
SCC155	SqCC Gain	18	16985597	17651076	18	0.25	0.1
SCC156	SqCC Gain	18	17908992	18073471	18	0.25	0.1
SCC157	SqCC Gain	18	22461317	22624097	18	0.2	0.15
SCC158	SqCC Gain	19	1217235	8825694	19	0.5	0
SCC159	SqCC Gain	19	9877472	19781144	19	0.45	0.15
SCC160	SqCC Gain	19	41821707	45363621	19	0.55	0.05
SCC161	SqCC Gain	19	46379823	46505048	19	0.4	0.1
SCC162	SqCC Gain	19	46448106	46603644	19	0.4	0.1
SCC163	SqCC Gain	19	49873525	52898290	19	0.4	0.25
SCC164	SqCC Gain	19	52747366	52897482	19	0.4	0.25
SCC165	SqCC Gain	19	52838341	54824785	19	0.45	0.2
SCC166	SqCC Gain	19	54756443	54928888	19	0.45	0.15
SCC167	SqCC Gain	19	54767614	56488628	19	0.55	0.1
SCC169	SqCC Gain	19	63465828	63654245	19	0.25	0.3
SCC170	SqCC Gain	20	1916254	2718056	20	0.25	0.05
SCC171	SqCC Gain	20	2658810	2856861	20	0.3	0
SCC172	SqCC Gain	20	2852497	5049159	20	0.35	0
SCC173	SqCC Loss	21	13607276	13789105	21	0.1	0.65
SCC174	SqCC Loss	21	39870739	40277968	21	0.1	0.4
SCC175	SqCC Loss	21	46630151	46823167	21	0.4	0.2
SCC176	SqCC Gain	22	15810291	16750785	22	0.25	0.25
SCC177	SqCC Gain	22	16596656	18286591	22	0.4	0.05
SCC178	SqCC Gain	22	18259185	18435258	22	0.4	0.1
SCC179	SqCC Gain	22	18396886	19036350	22	0.5	0.05
SCC180	SqCC Gain	22	19054378	19179048	22	0.45	0.05
SCC181	SqCC Gain	22	19068730	21842211	22	0.45	0.05
SCC182	SqCC Gain	22	22778022	23907153	22	0.3	0.1
SCC183	SqCC Gain	22	23875360	25463594	22	0.35	0.05
SCC184	SqCC Gain	22	25395919	25559080	22	0.35	0.2
SCC185	SqCC Gain	22	25504646	26747513	22	0.3	0.25
SCC186	SqCC Gain	22	26698847	27623744	22	0.35	0.1
SCC187	SqCC Gain	22	27557906	27708404	22	0.35	0.1
SCC188	SqCC Gain	22	27670003	27820465	22	0.35	0.1
SCC189	SqCC Gain	22	27836603	28857805	22	0.4	0.15
SCC190	SqCC Gain	22	28723339	30569712	22	0.35	0.2
SCC191	SqCC Gain	22	30540581	30768051	22	0.35	0.1
SCC192	SqCC Gain	22	30820449	31007521	22	0.3	0.15
SCC193	SqCC Gain	22	31068649	38753636	22	0.5	0.15
SCC194	SqCC Gain	22	38701347	39932970	22	0.55	0.15
SCC195	SqCC Gain	22	40022201	40279978	22	0.55	0
SCC196	SqCC Gain	22	40179346	40341594	22	0.55	0
SCC197	SqCC Gain	22	40289466	40738336	22	0.5	0.05
SCC198	SqCC Gain	22	40613971	40783178	22	0.5	0.05
SCC199	SqCC Gain	22	40739833	41802041	22	0.6	0
SCC200	SqCC Gain	22	41907119	43755175	22	0.4	0.1
SCC201	SqCC Gain	22	44015894	44262940	22	0.4	0.1
SCC202	SqCC Gain	22	44168135	45374580	22	0.45	0.05
SCC203	SqCC Gain	22	45300808	45472803	22	0.55	0.05
SCC204	SqCC Gain	22	48030670	49534385	22	0.6	0.15
Regions Absent in CIS
SqCCregions	Main Alteration	Chromosome	BPStart_BAC	BPEnd_BAC	Chr	Freq Gain	Freq Loss
SCC4	SqCC Loss	1	238948976	239099099	1
SCC19	SqCC Gain	3	58670054	58812691	3
SCC23	SqCC Gain	3	72154636	72306829	3
SCC109	SqCC Gain	9	8510469	8673223	9
SCC111	SqCC Gain	9	45977414	46275010	9
SCC124	SqCC Gain	11	55631471	55798134	11
SCC125	SqCC Gain	11	101092905	101257383	11
SCC128	SqCC Gain	12	8515255	8622570	12
SCC129	SqCC Gain	12	8623654	16205465	12
SCC130	SqCC Gain	12	16131300	22032094	12
SCC131	SqCC Gain	12	31367635	32687563	12
SCC132	SqCC Gain	12	41966519	42116850	12
SCC134	SqCC Gain	12	121598485	122752427	12
SCC135	SqCC Gain	13	102165710	102337565	13
SCC137	SqCC Gain	15	20217252	21418135	15
SCC152	SqCC Loss	17	46815760	46968415	17
SCC153	SqCC Loss	17	50133592	53048274	17
SCC168	SqCC Gain	19	60124998	61269582	19
