# Supplementary material for: Divergent Genomic and Epigenomic Landscapes of Lung Cancer Subtypes Underscore the Selection of Different Oncogenic Pathways during Tumor Development
Source: PLoS One. 2012 May 21;7(5):e37775. doi: 10.1371/journal.pone.0037775 (PMC3357406; doi:10.1371/journal.pone.0037775)
Supplement: Table S4 — Genes deregulated by copy number specifically in each subtype. (XLSX) [file pone.0037775.s005.xlsx]

## Sheet: AC Genes
Genes deregulated by copy number alterations specifcally in the AC subtype
Symbol	Status
AIM1	AC loss and underexpression
MIB1	AC loss and underexpression
LSM1	AC loss and underexpression
TTBK2	AC loss and underexpression
PTPRU	AC gain and overexpression
PITPNB	AC loss and underexpression
RIOK3	AC loss and underexpression
PLDN	AC loss and underexpression
MSTP9	AC gain and overexpression
PHF5A	AC loss and underexpression
C3orf17	AC loss and underexpression
MRPL3	AC loss and underexpression
IGSF11	AC loss and underexpression
EIF3S1	AC loss and underexpression
MAPK1	AC loss and underexpression
TIPIN	AC loss and underexpression
CDV3	AC loss and underexpression
WHSC1L1	AC loss and underexpression
TBCCD1	AC loss and underexpression
EDG8	AC loss and underexpression
FAM83F	AC loss and underexpression
ASH2L	AC loss and underexpression
NOTCH2NL	AC gain and overexpression
LCMT2	AC loss and underexpression
ERCC1	AC loss and underexpression
SNRPD1	AC loss and underexpression
SBNO1	AC loss and underexpression
PCYT1A	AC loss and underexpression
ADAL	AC loss and underexpression
CSDA	AC loss and underexpression
ADIPOR2	AC loss and underexpression
FYTTD1	AC loss and underexpression
CENTB2	AC loss and underexpression
MICAL3	AC loss and underexpression
LSG1	AC loss and underexpression
C3orf37	AC loss and underexpression
ZWILCH	AC loss and underexpression
CNBP	AC loss and underexpression
GJA5	AC gain and overexpression
TM2D2	AC loss and underexpression
CD9	AC loss and underexpression
CTDSPL2	AC loss and underexpression
CD160	AC gain and overexpression
KIAA2018	AC loss and underexpression
GTF2H3	AC loss and underexpression
TOPBP1	AC loss and underexpression
ATP2C1	AC loss and underexpression
PPP1R2	AC loss and underexpression
UMPS	AC loss and underexpression
CDC40	AC loss and underexpression
NAT13	AC loss and underexpression
BAG4	AC loss and underexpression
UBXD7	AC loss and underexpression
SPP2	AC gain and overexpression
PDZK1	AC gain and overexpression
MPHOSPH9	AC loss and underexpression
C22orf28	AC loss and underexpression
ITGA10	AC gain and overexpression
OPA1	AC loss and underexpression
DENND4A	AC loss and underexpression
KEAP1	AC loss and underexpression
EIF4A2	AC loss and underexpression
ZNF703	AC loss and underexpression
CENPM	AC loss and underexpression
NUDT17	AC gain and overexpression
ATP13A3	AC loss and underexpression
DDHD2	AC loss and underexpression
UBE1DC1	AC loss and underexpression
76P	AC loss and underexpression
PARP11	AC loss and underexpression
MGC33212	AC loss and underexpression

## Sheet: SqCC Genes
Genes deregulated by copy number specifically in the SqCC subtype
Symbol	Status	CIS Status
STAR	SqCC gain and overexpression
NLGN1	SqCC gain and overexpression
USP47	SqCC loss and underexpression
FGF12	SqCC gain and overexpression
SENP5	SqCC gain and overexpression
LGALS7	SqCC gain and overexpression
MGC48628	SqCC loss and underexpression
ZNF148	SqCC gain and overexpression
CDV3	SqCC gain and overexpression
KIAA0141	SqCC loss and underexpression
SELI	SqCC gain and overexpression
COX11	SqCC loss and underexpression	Only altered in tumor, not CIS
IGSF11	SqCC gain and overexpression
FAM83F	SqCC gain and overexpression
CDC20B	SqCC loss and underexpression
SMEK2	SqCC gain and overexpression
RAP2B	SqCC gain and overexpression
FOSL2	SqCC gain and overexpression
C2orf44	SqCC gain and overexpression
CFI	SqCC loss and underexpression
NOL5A	SqCC gain and overexpression
CENTB2	SqCC gain and overexpression
MYNN	SqCC gain and overexpression
FXR1	SqCC gain and overexpression
FYTTD1	SqCC gain and overexpression
FOXP1	SqCC loss and underexpression
NMD3	SqCC gain and overexpression
SCHIP1	SqCC gain and overexpression
PDGFC	SqCC loss and underexpression
MED12L	SqCC gain and overexpression
TCF3	SqCC gain and overexpression
DNAJC19	SqCC gain and overexpression
PRKCE	SqCC gain and overexpression
EIF2B5	SqCC gain and overexpression
PSME4	SqCC gain and overexpression
CYP2S1	SqCC gain and overexpression
ELF2	SqCC loss and underexpression
KIAA1648	SqCC gain and overexpression
RSRC1	SqCC gain and overexpression
TFG	SqCC gain and overexpression
ATP1B3	SqCC gain and overexpression
RECQL	SqCC gain and overexpression	Only altered in tumor, not CIS
SOX2	SqCC gain and overexpression
IL11	SqCC gain and overexpression	Only altered in tumor, not CIS
ACAD9	SqCC gain and overexpression
ERGIC1	SqCC loss and underexpression
RAPGEF2	SqCC loss and underexpression
NCBP2	SqCC gain and overexpression
KIAA2018	SqCC gain and overexpression
TNPO1	SqCC loss and underexpression
FBXO45	SqCC gain and overexpression
RPS27A	SqCC gain and overexpression
STRAP	SqCC gain and overexpression
PAK2	SqCC gain and overexpression
RFC2	SqCC gain and overexpression
ADD2	SqCC gain and overexpression
GINS4	SqCC gain and overexpression
C12orf32	SqCC gain and overexpression
SFRS10	SqCC gain and overexpression
PLXNA1	SqCC gain and overexpression
TOMM22	SqCC gain and overexpression
KPNA4	SqCC gain and overexpression
LRCH3	SqCC gain and overexpression
ECSIT	SqCC gain and overexpression
TBCCD1	SqCC gain and overexpression
PDXP	SqCC gain and overexpression
POLR2H	SqCC gain and overexpression
MICALCL	SqCC loss and underexpression
EAF2	SqCC gain and overexpression
SETD7	SqCC loss and underexpression
CLINT1	SqCC loss and underexpression
HSPC159	SqCC gain and overexpression
GLRB	SqCC loss and underexpression
GOLPH4	SqCC gain and overexpression
SH3RF1	SqCC loss and underexpression
SYNGR1	SqCC gain and overexpression
PLD1	SqCC gain and overexpression
SPTBN1	SqCC gain and overexpression
ARFIP1	SqCC loss and underexpression
DNAJC13	SqCC gain and overexpression
HS3ST1	SqCC loss and underexpression
C3orf37	SqCC gain and overexpression
MPHOSPH9	SqCC gain and overexpression
PPP4R2	SqCC loss and underexpression
BAG4	SqCC gain and overexpression
EIF4E3	SqCC loss and underexpression
SOS1	SqCC gain and overexpression
CUL3	SqCC loss and underexpression
HDGFRP3	SqCC gain and overexpression
DRG1	SqCC gain and overexpression
VPS8	SqCC gain and overexpression
RNF13	SqCC gain and overexpression
BID	SqCC gain and overexpression
PSMD2	SqCC gain and overexpression
PCYT1A	SqCC gain and overexpression
LSM4	SqCC gain and overexpression
KIAA1450	SqCC loss and underexpression
NR3C2	SqCC loss and underexpression
LTC4S	SqCC loss and underexpression
CRYBB3	SqCC gain and overexpression
MFI2	SqCC gain and overexpression
USP53	SqCC loss and underexpression
SETD8	SqCC gain and overexpression
MRPL51	SqCC gain and overexpression
WDR53	SqCC gain and overexpression
HMG2L1	SqCC gain and overexpression
FCHO2	SqCC loss and underexpression
BICD1	SqCC gain and overexpression	Only altered in tumor, not CIS
RPL39L	SqCC gain and overexpression
CENPO	SqCC gain and overexpression
TOMM70A	SqCC gain and overexpression
PRNP	SqCC gain and overexpression
MFSD1	SqCC gain and overexpression
CLDN1	SqCC gain and overexpression
EIF3S12	SqCC gain and overexpression
TBL1XR1	SqCC gain and overexpression
CBR4	SqCC loss and underexpression
ALS2CR19	SqCC loss and underexpression
C3orf28	SqCC gain and overexpression
TNPO2	SqCC gain and overexpression
NHP2L1	SqCC gain and overexpression
MAGI1	SqCC loss and underexpression
RAB33B	SqCC loss and underexpression
RPL35A	SqCC gain and overexpression
TACC1	SqCC gain and overexpression
MRPL47	SqCC gain and overexpression
BCL2L13	SqCC gain and overexpression
LOC116143	SqCC gain and overexpression
SIAH2	SqCC gain and overexpression
ANKRD50	SqCC loss and underexpression
PES1	SqCC gain and overexpression
SNRPD2	SqCC gain and overexpression
ENC1	SqCC loss and underexpression
LPP	SqCC gain and overexpression
C3orf26	SqCC gain and overexpression
CCDC108	SqCC loss and underexpression
CYFIP2	SqCC loss and underexpression
BRF2	SqCC gain and overexpression
GAS2L1	SqCC gain and overexpression
SGPP2	SqCC loss and underexpression
SHOX2	SqCC gain and overexpression
RAB10	SqCC gain and overexpression
KLHL24	SqCC gain and overexpression
SEC24D	SqCC loss and underexpression
TRIM2	SqCC loss and underexpression
CNOT8	SqCC loss and underexpression
JMJD2B	SqCC gain and overexpression
PHF5A	SqCC gain and overexpression
SPN	SqCC loss and underexpression
CSTA	SqCC gain and overexpression
CCND2	SqCC gain and overexpression
SNX25	SqCC loss and underexpression
BRD4	SqCC gain and overexpression
PPP5C	SqCC gain and overexpression
SRPRB	SqCC gain and overexpression
PPM1L	SqCC gain and overexpression
FETUB	SqCC gain and overexpression
MAML3	SqCC loss and underexpression
EDG8	SqCC gain and overexpression
KLK13	SqCC gain and overexpression
NRXN1	SqCC gain and overexpression
EPHB3	SqCC gain and overexpression
NUP62	SqCC gain and overexpression
RUVBL2	SqCC gain and overexpression
RPS17	SqCC gain and overexpression
KIAA1467	SqCC gain and overexpression
RYK	SqCC gain and overexpression
KIAA1276	SqCC loss and underexpression
PRKCI	SqCC gain and overexpression
INPP4B	SqCC loss and underexpression
ECT2	SqCC gain and overexpression
UBLCP1	SqCC loss and underexpression
ATP11B	SqCC gain and overexpression
TOMM40	SqCC gain and overexpression
RNF7	SqCC gain and overexpression
SMC4	SqCC gain and overexpression
TPM4	SqCC gain and overexpression
SAE1	SqCC gain and overexpression
ATP13A3	SqCC gain and overexpression
MSL2L1	SqCC gain and overexpression
CSDA	SqCC gain and overexpression
RPL28	SqCC gain and overexpression	Only altered in tumor, not CIS
KLK8	SqCC gain and overexpression
TIGD4	SqCC loss and underexpression
ZFP2	SqCC loss and underexpression
POMC	SqCC gain and overexpression
CLDND1	SqCC gain and overexpression
P2RY1	SqCC gain and overexpression
GAP43	SqCC gain and overexpression
A2ML1	SqCC gain and overexpression
MCHR1	SqCC gain and overexpression
RPL18	SqCC gain and overexpression
FLT3LG	SqCC gain and overexpression
GPR92	SqCC gain and overexpression
DNAJB2	SqCC loss and underexpression
PHLDB2	SqCC gain and overexpression
RPS15	SqCC gain and overexpression
NCK1	SqCC gain and overexpression
GTSE1	SqCC gain and overexpression
BNC1	SqCC gain and overexpression
PIGX	SqCC gain and overexpression
COPS7A	SqCC gain and overexpression
TP73L	SqCC gain and overexpression
DNAJB11	SqCC gain and overexpression
KPNA1	SqCC gain and overexpression
PLEKHA2	SqCC gain and overexpression
SORBS2	SqCC loss and underexpression
OAZ1	SqCC gain and overexpression
RNASEH2A	SqCC gain and overexpression
CHAC2	SqCC gain and overexpression
ARMC8	SqCC gain and overexpression
HNRPM	SqCC gain and overexpression
SREBF2	SqCC gain and overexpression
KCNJ14	SqCC gain and overexpression
OTX1	SqCC gain and overexpression
PHC3	SqCC gain and overexpression
ACTL6A	SqCC gain and overexpression
PARL	SqCC gain and overexpression
TM6SF1	SqCC gain and overexpression
FBXO11	SqCC gain and overexpression
C3orf17	SqCC gain and overexpression
KDELC1	SqCC gain and overexpression
TCF20	SqCC gain and overexpression
IL6ST	SqCC loss and underexpression
MUSTN1	SqCC loss and underexpression
SENP2	SqCC gain and overexpression
YEATS2	SqCC gain and overexpression
H1FX	SqCC gain and overexpression
MST101	SqCC loss and underexpression
BBX	SqCC gain and overexpression
C5orf4	SqCC loss and underexpression
RBP1	SqCC gain and overexpression
WFS1	SqCC loss and underexpression
SMCR7L	SqCC gain and overexpression
MRPS12	SqCC gain and overexpression
TXN2	SqCC gain and overexpression
ATXN7	SqCC loss and underexpression
AKT1S1	SqCC gain and overexpression
FBL	SqCC gain and overexpression
QTRTD1	SqCC gain and overexpression
RAD51AP1	SqCC gain and overexpression
DOT1L	SqCC gain and overexpression
PPAN	SqCC gain and overexpression
STRN	SqCC gain and overexpression
CHAF1A	SqCC gain and overexpression
EHBP1	SqCC gain and overexpression
APOL1	SqCC gain and overexpression
LSG1	SqCC gain and overexpression
UMPS	SqCC gain and overexpression
MSH6	SqCC gain and overexpression
STK36	SqCC loss and underexpression
TMEM144	SqCC loss and underexpression
LMNB2	SqCC gain and overexpression
SLC25A4	SqCC loss and underexpression
APOBEC3C	SqCC gain and overexpression
ARHGAP26	SqCC loss and underexpression
FHIT	SqCC loss and underexpression
NOTCH3	SqCC gain and overexpression
LOC202134	SqCC loss and underexpression
GFM1	SqCC gain and overexpression
LRRC58	SqCC gain and overexpression
RFC4	SqCC gain and overexpression
C4orf29	SqCC loss and underexpression
ZNF639	SqCC gain and overexpression
PANK2	SqCC gain and overexpression
A4GALT	SqCC gain and overexpression
ACTR2	SqCC gain and overexpression
FAM55C	SqCC gain and overexpression
FOXL2	SqCC gain and overexpression
CBX6	SqCC gain and overexpression
ARPM1	SqCC gain and overexpression
CAMK2N2	SqCC gain and overexpression
KNTC1	SqCC gain and overexpression
MXD1	SqCC gain and overexpression
RANBP1	SqCC gain and overexpression
DIP2A	SqCC loss and underexpression
PPM1F	SqCC gain and overexpression
RUFY1	SqCC loss and underexpression
CDKN2D	SqCC gain and overexpression
TMEM41A	SqCC gain and overexpression
TFRC	SqCC gain and overexpression
SLC9A9	SqCC gain and overexpression
MCM2	SqCC gain and overexpression
OR5J2	SqCC gain and overexpression	Only altered in tumor, not CIS
DKFZP686A01247	SqCC loss and underexpression
ATF5	SqCC gain and overexpression
FAM79B	SqCC gain and overexpression
BDH1	SqCC gain and overexpression
CLCN2	SqCC gain and overexpression
ILF3	SqCC gain and overexpression
GNB4	SqCC gain and overexpression
DCUN1D1	SqCC gain and overexpression
SIN3B	SqCC gain and overexpression
SLCO1A2	SqCC gain and overexpression	Only altered in tumor, not CIS
ZNF556	SqCC gain and overexpression
BDH2	SqCC loss and underexpression
XPO1	SqCC gain and overexpression
PNKD	SqCC loss and underexpression
MAPK1	SqCC gain and overexpression
CYP2U1	SqCC loss and underexpression
MELK	SqCC gain and overexpression
SH3D19	SqCC loss and underexpression
PRDM2	SqCC loss and underexpression
GCET2	SqCC gain and overexpression
PIK3R4	SqCC gain and overexpression
FAM43A	SqCC gain and overexpression
TRIM52	SqCC loss and underexpression
C3orf21	SqCC gain and overexpression
NMNAT3	SqCC gain and overexpression
CPEB4	SqCC loss and underexpression
NDFIP1	SqCC loss and underexpression
SH3GL3	SqCC gain and overexpression
ELMOD2	SqCC loss and underexpression
PRMT1	SqCC gain and overexpression
PELO	SqCC loss and underexpression
EFNA5	SqCC loss and underexpression
OPA1	SqCC gain and overexpression
ZNF367	SqCC gain and overexpression
MPPED1	SqCC gain and overexpression
MIB1	SqCC gain and overexpression
SLC1A5	SqCC gain and overexpression
COX6B2	SqCC gain and overexpression	Only altered in tumor, not CIS
LARP2	SqCC loss and underexpression
C22orf26	SqCC gain and overexpression
DDX39	SqCC gain and overexpression
FSD1	SqCC gain and overexpression
LRPPRC	SqCC gain and overexpression
PRKCSH	SqCC gain and overexpression
MAPK9	SqCC loss and underexpression
WHSC1L1	SqCC gain and overexpression
RBM9	SqCC gain and overexpression
CASP6	SqCC loss and underexpression
MICAL3	SqCC gain and overexpression
TMEM17	SqCC gain and overexpression
SBNO1	SqCC gain and overexpression
DLG1	SqCC gain and overexpression
RNF168	SqCC gain and overexpression
LOC90826	SqCC loss and underexpression
PRAME	SqCC gain and overexpression
MIER3	SqCC loss and underexpression
EHD3	SqCC gain and overexpression
IGFL1	SqCC gain and overexpression
MLF2	SqCC gain and overexpression
ACP6	SqCC loss and underexpression
GAPDH	SqCC gain and overexpression
STAG1	SqCC gain and overexpression
IGF2BP2	SqCC gain and overexpression
MAP9	SqCC loss and underexpression
APOBEC3B	SqCC gain and overexpression
AP2S1	SqCC gain and overexpression
KIAA1524	SqCC gain and overexpression
PARP8	SqCC loss and underexpression
RNF185	SqCC gain and overexpression
SUHW1	SqCC gain and overexpression
EXOSC5	SqCC gain and overexpression
CLTA	SqCC gain and overexpression
DENR	SqCC gain and overexpression
FBXO38	SqCC loss and underexpression
ASXL2	SqCC gain and overexpression
SNRPB	SqCC gain and overexpression
AP2M1	SqCC gain and overexpression
OTUD4	SqCC loss and underexpression
C3orf58	SqCC gain and overexpression
DAZAP1	SqCC gain and overexpression
TRIP12	SqCC loss and underexpression
OR7A5	SqCC gain and overexpression
PHB2	SqCC gain and overexpression
ABCF3	SqCC gain and overexpression
C4orf31	SqCC loss and underexpression
FLJ38482	SqCC loss and underexpression
DVL3	SqCC gain and overexpression
ACPL2	SqCC gain and overexpression
LTBR	SqCC gain and overexpression
FLJ20184	SqCC loss and underexpression
TTLL1	SqCC gain and overexpression
MAP6D1	SqCC gain and overexpression
GMPS	SqCC gain and overexpression
MN1	SqCC gain and overexpression
C19orf23	SqCC gain and overexpression
EEFSEC	SqCC gain and overexpression
MGC2408	SqCC gain and overexpression
CTSO	SqCC loss and underexpression
KLKB1	SqCC loss and underexpression
PLAC2	SqCC gain and overexpression
ALG3	SqCC gain and overexpression
MAPK12	SqCC gain and overexpression
GLT25D1	SqCC gain and overexpression
C3orf59	SqCC gain and overexpression
C20orf27	SqCC gain and overexpression
SH3GL1	SqCC gain and overexpression
FOXRED2	SqCC gain and overexpression
OSBPL11	SqCC gain and overexpression
KHSRP	SqCC gain and overexpression
RELB	SqCC gain and overexpression
KLF16	SqCC gain and overexpression
GPRC5D	SqCC gain and overexpression
FHAD1	SqCC loss and underexpression
C22orf28	SqCC gain and overexpression
POLQ	SqCC gain and overexpression
GALNT10	SqCC loss and underexpression
GPR19	SqCC gain and overexpression
GRWD1	SqCC gain and overexpression
GPBP1	SqCC loss and underexpression
PHF17	SqCC loss and underexpression
BLM	SqCC gain and overexpression
EIF4EBP1	SqCC gain and overexpression
MGC45438	SqCC loss and underexpression
FAM86A	SqCC loss and underexpression
CD3EAP	SqCC gain and overexpression
TOM1L1	SqCC loss and underexpression	Only altered in tumor, not CIS
CRKL	SqCC gain and overexpression
PTMS	SqCC gain and overexpression
EIF4G1	SqCC gain and overexpression
CD9	SqCC gain and overexpression
UHRF1	SqCC gain and overexpression
CDC45L	SqCC gain and overexpression
STXBP4	SqCC loss and underexpression	Only altered in tumor, not CIS
DHX29	SqCC loss and underexpression
SAMD1	SqCC gain and overexpression
FOXM1	SqCC gain and overexpression
SCGB3A1	SqCC loss and underexpression
TEAD4	SqCC gain and overexpression
MCM5	SqCC gain and overexpression
C19orf48	SqCC gain and overexpression
KLHL2	SqCC loss and underexpression
ASF1B	SqCC gain and overexpression
TPI1	SqCC gain and overexpression
CDCA3	SqCC gain and overexpression
ZNF330	SqCC loss and underexpression
ANAPC4	SqCC loss and underexpression
ADCY3	SqCC gain and overexpression
EMB	SqCC loss and underexpression
TNFRSF13C	SqCC gain and overexpression
FBXO27	SqCC gain and overexpression
CYP4V2	SqCC loss and underexpression
ETFDH	SqCC loss and underexpression
SH3BP1	SqCC gain and overexpression
FLJ10213	SqCC loss and underexpression
LOC51149	SqCC loss and underexpression
LRBA	SqCC loss and underexpression
ANKFN1	SqCC loss and underexpression	Only altered in tumor, not CIS
DKFZP564J102	SqCC loss and underexpression
TUBA4	SqCC loss and underexpression
SPATA4	SqCC loss and underexpression
C1orf158	SqCC loss and underexpression
WDR69	SqCC loss and underexpression
LRP2BP	SqCC loss and underexpression
