# Supplementary material for: Divergent Genomic and Epigenomic Landscapes of Lung Cancer Subtypes Underscore the Selection of Different Oncogenic Pathways during Tumor Development
Source: PLoS One. 2012 May 21;7(5):e37775. doi: 10.1371/journal.pone.0037775 (PMC3357406; doi:10.1371/journal.pone.0037775)
Supplement: Table S6 — Genes deregulated by DNA methylation in each subtype. (XLSX) [file pone.0037775.s007.xlsx]

## Sheet: AC Methylation Genes
Genes deregulated by DNA methylation specfically in the AC subtype
symbol	Most Frequent
LRP6	AC hypermethylated and underexpressed
ATP10A	AC hypermethylated and underexpressed
ITGA9	AC hypermethylated and underexpressed
RUNX2	AC hypermethylated and underexpressed
CYBRD1	AC hypermethylated and underexpressed
THRB	AC hypermethylated and underexpressed
NRP1	AC hypermethylated and underexpressed
RUFY1	AC hypermethylated and underexpressed
GPR133	AC hypermethylated and underexpressed
LOC283932	AC hypermethylated and underexpressed
RAPH1	AC hypermethylated and underexpressed
DGKD	AC hypermethylated and underexpressed
CDC2L2	AC hypermethylated and underexpressed
MLLT6	AC hypermethylated and underexpressed
ARHGEF11	AC hypermethylated and underexpressed
SPATA1	AC hypermethylated and underexpressed
DENND3	AC hypermethylated and underexpressed
FAM69B	AC hypermethylated and underexpressed
MGC15523	AC hypermethylated and underexpressed
SFTPD	AC hypermethylated and underexpressed
T	AC hypermethylated and underexpressed
SELENBP1	AC hypermethylated and underexpressed
TM4SF4	AC hypermethylated and underexpressed
GRB7	AC hypermethylated and underexpressed
NUMA1	AC hypermethylated and underexpressed
SLC22A18AS	AC hypermethylated and underexpressed
OCIAD1	AC hypermethylated and underexpressed
RNF186	AC hypermethylated and underexpressed
PLA2G12B	AC hypermethylated and underexpressed
SLC39A4	AC hypermethylated and underexpressed
MGC50811	AC hypermethylated and underexpressed
SFTPG	AC hypermethylated and underexpressed

## Sheet: SqCC Methylation Genes
Genes deregulated by DNA methylation specifically in the SqCC subtype
symbol	Most Frequent
SPTBN1	SqCC hypermethylated and underexpressed
RPH3AL	SqCC hypermethylated and underexpressed
C4orf8	SqCC hypermethylated and underexpressed
HDAC11	SqCC hypermethylated and underexpressed
TMED6	SqCC hypermethylated and underexpressed
DNALI1	SqCC hypermethylated and underexpressed
SNTB1	SqCC hypermethylated and underexpressed
HIPK2	SqCC hypermethylated and underexpressed
C10orf11	SqCC hypermethylated and underexpressed
ERBB3	SqCC hypermethylated and underexpressed
ZC3H11A	SqCC hypermethylated and underexpressed
MYST4	SqCC hypermethylated and underexpressed
LMO7	SqCC hypermethylated and underexpressed
CPM	SqCC hypermethylated and underexpressed
SNRPN	SqCC hypermethylated and underexpressed
HNMT	SqCC hypermethylated and underexpressed
GALNT1	SqCC hypermethylated and underexpressed
ABR	SqCC hypermethylated and underexpressed
NFIX	SqCC hypermethylated and underexpressed
ANK3	SqCC hypermethylated and underexpressed
PRDM2	SqCC hypermethylated and underexpressed
KIAA0319L	SqCC hypermethylated and underexpressed
HLCS	SqCC hypermethylated and underexpressed
MVP	SqCC hypermethylated and underexpressed
ZDHHC21	SqCC hypermethylated and underexpressed
CYFIP2	SqCC hypermethylated and underexpressed
C6orf206	SqCC hypermethylated and underexpressed
C6orf111	SqCC hypermethylated and underexpressed
KCNQ1	SqCC hypermethylated and underexpressed
OTUD4	SqCC hypermethylated and underexpressed
KIAA0240	SqCC hypermethylated and underexpressed
RDHE2	SqCC hypermethylated and underexpressed
PPM1A	SqCC hypermethylated and underexpressed
FXYD1	SqCC hypermethylated and underexpressed
JAK1	SqCC hypermethylated and underexpressed
LONRF2	SqCC hypermethylated and underexpressed
SMPD3	SqCC hypermethylated and underexpressed
CKMT2	SqCC hypermethylated and underexpressed
PDXK	SqCC hypermethylated and underexpressed
CD47	SqCC hypermethylated and underexpressed
EXDL2	SqCC hypermethylated and underexpressed
ZMYND17	SqCC hypermethylated and underexpressed
TMEM45B	SqCC hypermethylated and underexpressed
PEG3	SqCC hypermethylated and underexpressed
ZNF540	SqCC hypermethylated and underexpressed
SGPP2	SqCC hypermethylated and underexpressed
HOOK3	SqCC hypermethylated and underexpressed
EPS8L1	SqCC hypermethylated and underexpressed
SRI	SqCC hypermethylated and underexpressed
USP54	SqCC hypermethylated and underexpressed
C1orf87	SqCC hypermethylated and underexpressed
CFI	SqCC hypermethylated and underexpressed
CAPN9	SqCC hypermethylated and underexpressed
ZNF44	SqCC hypermethylated and underexpressed
RNF190	SqCC hypermethylated and underexpressed
C9orf68	SqCC hypermethylated and underexpressed
ALAD	SqCC hypermethylated and underexpressed
CCDC19	SqCC hypermethylated and underexpressed
AMY2B	SqCC hypermethylated and underexpressed
ZNF542	SqCC hypermethylated and underexpressed
DNASE1	SqCC hypermethylated and underexpressed
ZNF471	SqCC hypermethylated and underexpressed
PCMTD1	SqCC hypermethylated and underexpressed
STX12	SqCC hypermethylated and underexpressed
CUEDC1	SqCC hypermethylated and underexpressed
CCDC23	SqCC hypermethylated and underexpressed
PSEN2	SqCC hypermethylated and underexpressed
FUT3	SqCC hypermethylated and underexpressed
ALDH3B1	SqCC hypermethylated and underexpressed
GLRB	SqCC hypermethylated and underexpressed
LTC4S	SqCC hypermethylated and underexpressed
PARP3	SqCC hypermethylated and underexpressed
DYX1C1	SqCC hypermethylated and underexpressed
SCNN1A	SqCC hypermethylated and underexpressed
ANPEP	SqCC hypermethylated and underexpressed
CFB	SqCC hypermethylated and underexpressed
FHIT	SqCC hypermethylated and underexpressed
KRT8	SqCC hypermethylated and underexpressed
MST1R	SqCC hypermethylated and underexpressed
PIGR	SqCC hypermethylated and underexpressed
TFF3	SqCC hypermethylated and underexpressed
ACOX2	SqCC hypermethylated and underexpressed
NME5	SqCC hypermethylated and underexpressed
BLZF1	SqCC hypermethylated and underexpressed
CAPS	SqCC hypermethylated and underexpressed
ELF3	SqCC hypermethylated and underexpressed
GPT	SqCC hypermethylated and underexpressed
VAV1	SqCC hypermethylated and underexpressed
ATP9A	SqCC hypermethylated and underexpressed
CNKSR1	SqCC hypermethylated and underexpressed
SIRT1	SqCC hypermethylated and underexpressed
SPDEF	SqCC hypermethylated and underexpressed
RGS17	SqCC hypermethylated and underexpressed
VSIG2	SqCC hypermethylated and underexpressed
TJP3	SqCC hypermethylated and underexpressed
TEKT2	SqCC hypermethylated and underexpressed
ProSAPiP1	SqCC hypermethylated and underexpressed
GPR116	SqCC hypermethylated and underexpressed
PLA1A	SqCC hypermethylated and underexpressed
LACTB2	SqCC hypermethylated and underexpressed
C3orf18	SqCC hypermethylated and underexpressed
FOLR1	SqCC hypermethylated and underexpressed
PER3	SqCC hypermethylated and underexpressed
THUMPD1	SqCC hypermethylated and underexpressed
LRP2BP	SqCC hypermethylated and underexpressed
GSDML	SqCC hypermethylated and underexpressed
ZNF167	SqCC hypermethylated and underexpressed
ABO	SqCC hypermethylated and underexpressed
C11orf16	SqCC hypermethylated and underexpressed
OSBPL5	SqCC hypermethylated and underexpressed
ATAD4	SqCC hypermethylated and underexpressed
NEIL1	SqCC hypermethylated and underexpressed
ZNF671	SqCC hypermethylated and underexpressed
SLC44A4	SqCC hypermethylated and underexpressed
TEKT3	SqCC hypermethylated and underexpressed
DCST2	SqCC hypermethylated and underexpressed
CCDC17	SqCC hypermethylated and underexpressed
DNAJB13	SqCC hypermethylated and underexpressed
TTLL6	SqCC hypermethylated and underexpressed
C12orf51	SqCC hypermethylated and underexpressed
PHYHD1	SqCC hypermethylated and underexpressed
C20orf85	SqCC hypermethylated and underexpressed
TMEM61	SqCC hypermethylated and underexpressed
DNAJC12	SqCC hypermethylated and underexpressed
MB	SqCC hypermethylated and underexpressed
APOBEC4	SqCC hypermethylated and underexpressed
CAPN3	SqCC hypermethylated and underexpressed
SYNCRIP	SqCC hypomethylated and overexpressed
DR1	SqCC hypomethylated and overexpressed
PRCP	SqCC hypomethylated and overexpressed
UQCRH	SqCC hypomethylated and overexpressed
PTGS2	SqCC hypomethylated and overexpressed
BCAS3	SqCC hypomethylated and overexpressed
UBE1L2	SqCC hypomethylated and overexpressed
RAD18	SqCC hypomethylated and overexpressed
ATP2C1	SqCC hypomethylated and overexpressed
TNKS	SqCC hypomethylated and overexpressed
CORO1C	SqCC hypomethylated and overexpressed
MBD1	SqCC hypomethylated and overexpressed
BCL2	SqCC hypomethylated and overexpressed
PCYT1A	SqCC hypomethylated and overexpressed
NOC3L	SqCC hypomethylated and overexpressed
SPPL2A	SqCC hypomethylated and overexpressed
DST	SqCC hypomethylated and overexpressed
PPME1	SqCC hypomethylated and overexpressed
FANCD2	SqCC hypomethylated and overexpressed
FAM29A	SqCC hypomethylated and overexpressed
CIDEC	SqCC hypomethylated and overexpressed
ZNF207	SqCC hypomethylated and overexpressed
RPS27A	SqCC hypomethylated and overexpressed
RQCD1	SqCC hypomethylated and overexpressed
PBX1	SqCC hypomethylated and overexpressed
NCK1	SqCC hypomethylated and overexpressed
ANAPC7	SqCC hypomethylated and overexpressed
TOP2A	SqCC hypomethylated and overexpressed
SND1	SqCC hypomethylated and overexpressed
AOAH	SqCC hypomethylated and overexpressed
SLC25A32	SqCC hypomethylated and overexpressed
KRIT1	SqCC hypomethylated and overexpressed
SHCBP1	SqCC hypomethylated and overexpressed
SMEK2	SqCC hypomethylated and overexpressed
SEMA4F	SqCC hypomethylated and overexpressed
CD3E	SqCC hypomethylated and overexpressed
CHORDC1	SqCC hypomethylated and overexpressed
C22orf9	SqCC hypomethylated and overexpressed
ZWILCH	SqCC hypomethylated and overexpressed
CENTB2	SqCC hypomethylated and overexpressed
CDC27	SqCC hypomethylated and overexpressed
FBXO22	SqCC hypomethylated and overexpressed
RPL4	SqCC hypomethylated and overexpressed
NPM1	SqCC hypomethylated and overexpressed
LAMB1	SqCC hypomethylated and overexpressed
DENND2C	SqCC hypomethylated and overexpressed
HPSE2	SqCC hypomethylated and overexpressed
MRPS30	SqCC hypomethylated and overexpressed
BAG4	SqCC hypomethylated and overexpressed
CHEK1	SqCC hypomethylated and overexpressed
HIF1AN	SqCC hypomethylated and overexpressed
ATP6V1C1	SqCC hypomethylated and overexpressed
BRCA1	SqCC hypomethylated and overexpressed
RBMS1	SqCC hypomethylated and overexpressed
RAD51L3	SqCC hypomethylated and overexpressed
PARP11	SqCC hypomethylated and overexpressed
DSG2	SqCC hypomethylated and overexpressed
CYCS	SqCC hypomethylated and overexpressed
LANCL1	SqCC hypomethylated and overexpressed
ARMC8	SqCC hypomethylated and overexpressed
RAD54B	SqCC hypomethylated and overexpressed
RNF185	SqCC hypomethylated and overexpressed
DUT	SqCC hypomethylated and overexpressed
JPH1	SqCC hypomethylated and overexpressed
BRIP1	SqCC hypomethylated and overexpressed
MPHOSPH1	SqCC hypomethylated and overexpressed
NME1	SqCC hypomethylated and overexpressed
HOXC4	SqCC hypomethylated and overexpressed
JAKMIP2	SqCC hypomethylated and overexpressed
RPS24	SqCC hypomethylated and overexpressed
RPL32	SqCC hypomethylated and overexpressed
HCK	SqCC hypomethylated and overexpressed
PSMB7	SqCC hypomethylated and overexpressed
RGS20	SqCC hypomethylated and overexpressed
CAPZA1	SqCC hypomethylated and overexpressed
ITGB4BP	SqCC hypomethylated and overexpressed
SNRPB	SqCC hypomethylated and overexpressed
GM2A	SqCC hypomethylated and overexpressed
CSDA	SqCC hypomethylated and overexpressed
C6orf166	SqCC hypomethylated and overexpressed
PSMD11	SqCC hypomethylated and overexpressed
STX6	SqCC hypomethylated and overexpressed
PLEKHB2	SqCC hypomethylated and overexpressed
RAB35	SqCC hypomethylated and overexpressed
MTPN	SqCC hypomethylated and overexpressed
TNC	SqCC hypomethylated and overexpressed
C3orf26	SqCC hypomethylated and overexpressed
NDUFA9	SqCC hypomethylated and overexpressed
SAE1	SqCC hypomethylated and overexpressed
RBX1	SqCC hypomethylated and overexpressed
SFRS10	SqCC hypomethylated and overexpressed
MAPRE1	SqCC hypomethylated and overexpressed
FAH	SqCC hypomethylated and overexpressed
EIF1	SqCC hypomethylated and overexpressed
TLE4	SqCC hypomethylated and overexpressed
SF3B3	SqCC hypomethylated and overexpressed
TLN1	SqCC hypomethylated and overexpressed
RPL35A	SqCC hypomethylated and overexpressed
FOLH1	SqCC hypomethylated and overexpressed
APPBP1	SqCC hypomethylated and overexpressed
RPS19	SqCC hypomethylated and overexpressed
BMP1	SqCC hypomethylated and overexpressed
EIF5A	SqCC hypomethylated and overexpressed
H2AFZ	SqCC hypomethylated and overexpressed
IARS	SqCC hypomethylated and overexpressed
ITGA5	SqCC hypomethylated and overexpressed
KLK1	SqCC hypomethylated and overexpressed
MSI1	SqCC hypomethylated and overexpressed
NEK2	SqCC hypomethylated and overexpressed
PIK3C3	SqCC hypomethylated and overexpressed
PSMC3	SqCC hypomethylated and overexpressed
RECQL	SqCC hypomethylated and overexpressed
ADAM17	SqCC hypomethylated and overexpressed
THOP1	SqCC hypomethylated and overexpressed
HIST1H2BH	SqCC hypomethylated and overexpressed
SLC25A11	SqCC hypomethylated and overexpressed
RNGTT	SqCC hypomethylated and overexpressed
SH2D2A	SqCC hypomethylated and overexpressed
ORC1L	SqCC hypomethylated and overexpressed
PTTG1	SqCC hypomethylated and overexpressed
CAD	SqCC hypomethylated and overexpressed
GSTO1	SqCC hypomethylated and overexpressed
PDCD1	SqCC hypomethylated and overexpressed
SIAH2	SqCC hypomethylated and overexpressed
DLX5	SqCC hypomethylated and overexpressed
E2F1	SqCC hypomethylated and overexpressed
HIST1H1D	SqCC hypomethylated and overexpressed
SHMT2	SqCC hypomethylated and overexpressed
MKRN3	SqCC hypomethylated and overexpressed
MC4R	SqCC hypomethylated and overexpressed
GZMA	SqCC hypomethylated and overexpressed
SHFM1	SqCC hypomethylated and overexpressed
RAD51AP1	SqCC hypomethylated and overexpressed
RELB	SqCC hypomethylated and overexpressed
GJB6	SqCC hypomethylated and overexpressed
LILRA3	SqCC hypomethylated and overexpressed
SHOX2	SqCC hypomethylated and overexpressed
NPM3	SqCC hypomethylated and overexpressed
RACGAP1	SqCC hypomethylated and overexpressed
ARHGAP11A	SqCC hypomethylated and overexpressed
KLK13	SqCC hypomethylated and overexpressed
MRPL51	SqCC hypomethylated and overexpressed
ICK	SqCC hypomethylated and overexpressed
RSRC1	SqCC hypomethylated and overexpressed
C17orf80	SqCC hypomethylated and overexpressed
C8orf32	SqCC hypomethylated and overexpressed
ASPM	SqCC hypomethylated and overexpressed
BRF2	SqCC hypomethylated and overexpressed
ACCN2	SqCC hypomethylated and overexpressed
EXOSC5	SqCC hypomethylated and overexpressed
C16orf61	SqCC hypomethylated and overexpressed
PPAN	SqCC hypomethylated and overexpressed
AKR1B10	SqCC hypomethylated and overexpressed
PDXP	SqCC hypomethylated and overexpressed
BXDC5	SqCC hypomethylated and overexpressed
MGC2408	SqCC hypomethylated and overexpressed
SKP2	SqCC hypomethylated and overexpressed
ZDHHC12	SqCC hypomethylated and overexpressed
C6orf114	SqCC hypomethylated and overexpressed
C20orf72	SqCC hypomethylated and overexpressed
BRI3BP	SqCC hypomethylated and overexpressed
C9orf30	SqCC hypomethylated and overexpressed
TRUB1	SqCC hypomethylated and overexpressed
RDH12	SqCC hypomethylated and overexpressed
C1orf74	SqCC hypomethylated and overexpressed
CREG2	SqCC hypomethylated and overexpressed
C12orf60	SqCC hypomethylated and overexpressed
SNRPD2	SqCC hypomethylated and overexpressed
FBXO27	SqCC hypomethylated and overexpressed
PTK9	SqCC hypomethylated and overexpressed
