# Supplementary material for: Divergent Genomic and Epigenomic Landscapes of Lung Cancer Subtypes Underscore the Selection of Different Oncogenic Pathways during Tumor Development
Source: PLoS One. 2012 May 21;7(5):e37775. doi: 10.1371/journal.pone.0037775 (PMC3357406; doi:10.1371/journal.pone.0037775)
Supplement: Table S9 — Genes demonstrating concerted genetic, epigenetic and transcriptional disruption in SqCC. (XLSX) [file pone.0037775.s010.xlsx]

## Sheet: Table S7.txt
Gene	SqCC Copy Number Status	SqCC Methylation Status
PRDM2	Loss and Underexpressed	Hypermethylated and Underexpressed
CYFIP2	Loss and Underexpressed	Hypermethylated and Underexpressed
OTUD4	Loss and Underexpressed	Hypermethylated and Underexpressed
SGPP2	Loss and Underexpressed	Hypermethylated and Underexpressed
CFI	Loss and Underexpressed	Hypermethylated and Underexpressed
GLRB	Loss and Underexpressed	Hypermethylated and Underexpressed
LTC4S	Loss and Underexpressed	Hypermethylated and Underexpressed
FHIT	Loss and Underexpressed	Hypermethylated and Underexpressed
LRP2BP	Loss and Underexpressed	Hypermethylated and Underexpressed
PCYT1A	Gained and Overexpressed	Hypomethylated and Overexpressed
RPS27A	Gained and Overexpressed	Hypomethylated and Overexpressed
NCK1	Gained and Overexpressed	Hypomethylated and Overexpressed
SMEK2	Gained and Overexpressed	Hypomethylated and Overexpressed
CENTB2	Gained and Overexpressed	Hypomethylated and Overexpressed
BAG4	Gained and Overexpressed	Hypomethylated and Overexpressed
ARMC8	Gained and Overexpressed	Hypomethylated and Overexpressed
RNF185	Gained and Overexpressed	Hypomethylated and Overexpressed
SNRPB	Gained and Overexpressed	Hypomethylated and Overexpressed
CSDA	Gained and Overexpressed	Hypomethylated and Overexpressed
C3orf26	Gained and Overexpressed	Hypomethylated and Overexpressed
SAE1	Gained and Overexpressed	Hypomethylated and Overexpressed
SFRS10	Gained and Overexpressed	Hypomethylated and Overexpressed
RPL35A	Gained and Overexpressed	Hypomethylated and Overexpressed
RECQL	Gained and Overexpressed	Hypomethylated and Overexpressed
SIAH2	Gained and Overexpressed	Hypomethylated and Overexpressed
RAD51AP1	Gained and Overexpressed	Hypomethylated and Overexpressed
RELB	Gained and Overexpressed	Hypomethylated and Overexpressed
SHOX2	Gained and Overexpressed	Hypomethylated and Overexpressed
KLK13	Gained and Overexpressed	Hypomethylated and Overexpressed
MRPL51	Gained and Overexpressed	Hypomethylated and Overexpressed
RSRC1	Gained and Overexpressed	Hypomethylated and Overexpressed
BRF2	Gained and Overexpressed	Hypomethylated and Overexpressed
EXOSC5	Gained and Overexpressed	Hypomethylated and Overexpressed
PPAN	Gained and Overexpressed	Hypomethylated and Overexpressed
PDXP	Gained and Overexpressed	Hypomethylated and Overexpressed
MGC2408	Gained and Overexpressed	Hypomethylated and Overexpressed
SNRPD2	Gained and Overexpressed	Hypomethylated and Overexpressed
FBXO27	Gained and Overexpressed	Hypomethylated and Overexpressed
