# Supplementary material for: Divergent Genomic and Epigenomic Landscapes of Lung Cancer Subtypes Underscore the Selection of Different Oncogenic Pathways during Tumor Development
Source: PLoS One. 2012 May 21;7(5):e37775. doi: 10.1371/journal.pone.0037775 (PMC3357406; doi:10.1371/journal.pone.0037775)
Supplement: Table S11 — CMAP analysis of subtype-specific genes. (XLS) [file pone.0037775.s012.xls]

## Sheet: SqCC CMAP Results
rank	cmap name	n	enrichment	p	Drug Category
1	puromycin	4	-0.971	0	Translation Inhibitor
2	thioridazine	20	-0.572	0	Antipshychotic
3	trichostatin A	182	-0.539	0	HDAC Inhibitor
4	LY-294002	61	-0.454	0	PI3K Inhibitor
5	sirolimus	44	-0.426	0	mTOR Inhibitor
6	tanespimycin	62	-0.387	0	HSP90 Inhibitor
7	fluphenazine	18	-0.57	2e-05	Antipshychotic
8	MS-275	2	-0.996	4e-05	HDAC Inhibitor
9	wortmannin	18	-0.514	4e-05	PI3K Inhibitor
10	trifluoperazine	16	-0.534	8e-05	Antipshychotic
11	prochlorperazine	16	-0.506	0.00018	Antipshychotic
12	vorinostat	12	-0.589	0.0002	HDAC Inhibitor
13	cephaeline	5	-0.834	0.00032	Emesis Inducer
14	perhexiline	4	-0.885	0.0004	Antianginal
15	calcium folinate	5	0.801	0.0007	Antimetabolite
16	emetine	4	-0.856	0.00076	Antiprotozoal
17	resveratrol	9	-0.614	0.00084	Phytoalexin
18	pargyline	4	-0.84	0.00117	Monoamine oxidase inhibitor
19	quinostatin	2	-0.974	0.00139	PI3K Inhibitor
20	pyrvinium	6	-0.702	0.00163	Anthelmintic

## Sheet: AC CMAP Results
rank	cmap name	n	enrichment	p	Drug Category
1	tanespimycin	62	0.312	0	HSP90 Inhibitor
2	lycorine	5	-0.859	8e-05	N/A
3	vincamine	6	-0.787	0.00018	Vasodilator
4	Prestwick-692	4	-0.89	0.0003	N/A
5	felbinac	4	-0.889	0.00032	Antiinflammatory
6	adiphenine	5	-0.811	0.00056	Antispasmodic
7	isocarboxazid	5	-0.772	0.0011	Monoamine oxidase inhibitor
8	pentoxyverine	4	0.82	0.00187	Antitussive
9	lorglumide	5	0.732	0.00316	Cholecystokinin antagonis
10	ethotoin	6	0.671	0.0035	Anticonvulsant
11	famprofazone	6	0.671	0.00352	Analgesic
12	chrysin	3	0.871	0.00399	Aromatase inhibitor
13	cefmetazole	4	-0.782	0.00458	Cephalosporin
14	MS-275	2	0.949	0.00481	HDAC Inhibitor
15	riboflavin	4	0.772	0.00511	Micronutrient
16	sulfamethoxypyridazine	5	0.706	0.00521	Sulfanilamide antibacterial
17	0175029-0000	6	0.653	0.00524	N/A
18	metyrapone	4	0.769	0.00555	Steroid 11β-hydroxylase inhibitor
19	pizotifen	4	-0.765	0.00627	Serotonin antagonist
20	thioguanosine	4	0.76	0.00627	Antimetabolite
